# Supplementary material
Source: MDPI journal article supplement (https://www.mdpi.com/2073-4468/2/1/93)

**Figure S1.** HPLC analysis of fraction 5. Fraction 5 was analyzed using Superdex 75 10/300 GL. The main peak of the chromatogram was the M86 monomer form.

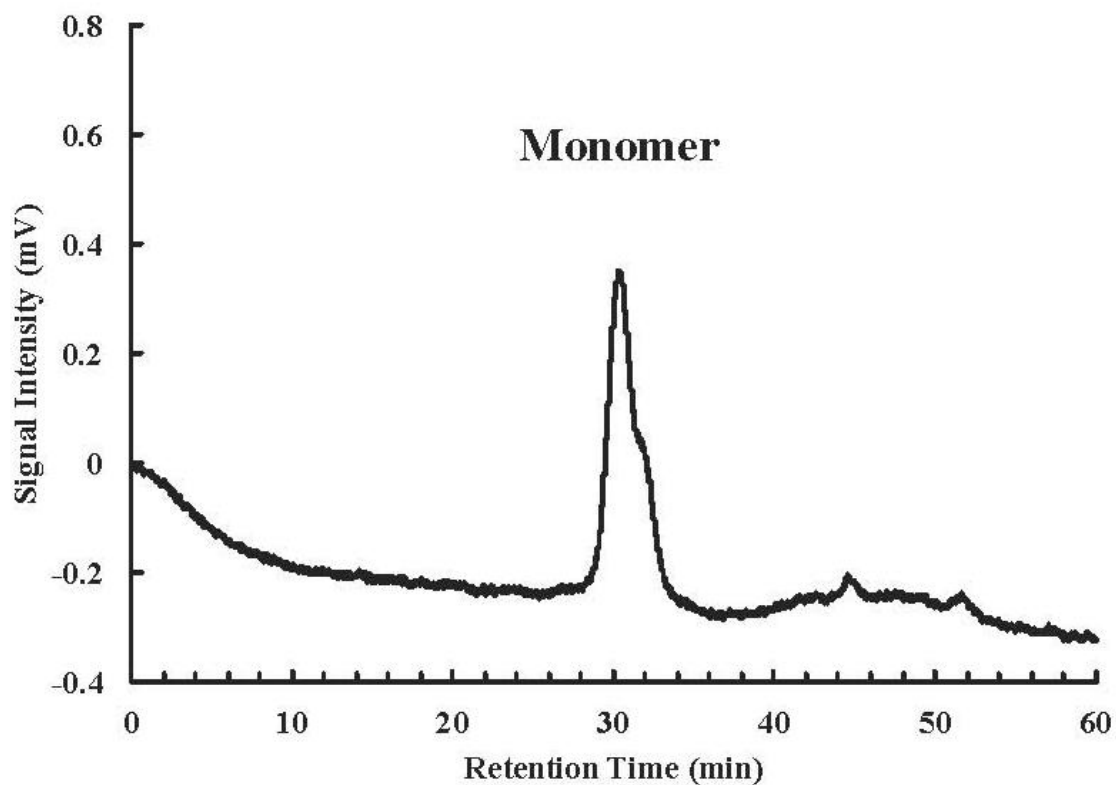

**Figure S2.** Three molecules species of fraction 5 (Figure 2b-3) has morphine-binding activity. Affinity-purified M86 with HisTrap column was incubated in an immunotube coated with morphine-C-Tg as described in Experimental section 3.5. The bound M86 was eluted with 0.1 M glycine-HCl (pH 2.2). The eluted M86 was subjected to 15% SDS-PAGE under reducing conditions and was visualized using silver staining.

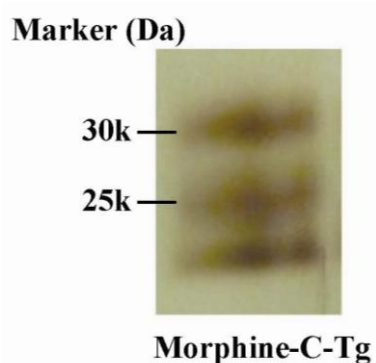

Supplement: s1 [file s1]
